# Supplementary material for: Interrogating the nature of aggregates formed in a model azine based ESIPT coupled AIE active probe: stark differences in photodynamics in the solid state and aggregates in water
Source: Royal Society of Chemistry journal article supplement (doi:10.1039/d3cp03603k), 2023-01-01
Supplement: d3cp03603k1.pdf [file d3cp03603k1.pdf]

### Supporting Information

#### **Interrogating the nature of aggregates formed in a model azine based ESIPT coupled AIE active probe: stark differences in photodynamics in the solid state and aggregates in water**

Akash Das, ‡<sup>a</sup> Arghyadeep Bhattacharyya, ‡<sup>a, b</sup> Nikhil Guchhait\*<sup>a</sup>

*Department of Chemistry, University of Calcutta, 92, A.P.C. Road, Kolkata, 700009, India*

*<sup>b</sup> Departamento de Química Física, Facultad de Ciencias Ambientales y Bioquímica, and INAMOL, Universidad de Castilla-La Mancha, Avenida Carlos III, S.N., 45071 Toledo, Spain*

‡These authors contributed equally. \* Corresponding author.

#### **Contents**

- 1. <sup>1</sup>H NMR Spectrum of BNHMP in CDCl<sub>3</sub>.**
- 2. <sup>13</sup>C NMR Spectrum of BNHMP in CDCl<sub>3</sub>.**
- 3. ESI-MS of BNHMP in acetonitrile.**
- 4. FTIR Spectrum of BNHMP.**
- 5. ORTEP diagram of BNHMP.**
- 6. Table for important crystallographic parameters of BNHMP.**
- 7. Non-planarity of OH proton.**
- 8. Full scale emission spectra of BNHMP in various solvents and the corresponding CIE diagrams.**
- 9. Time-resolved emission decays of BNHMP in various solvents at all observation wavelengths.**
- 10. Excited State lifetime parameters of BNHMP in DCM, THF and water.**
- 11. Steady state emission spectra of BNHMP in ethanol, PEG-400 and water.**
- 12. Full range solid state emission spectrum upon excitation at 300 nm.**
- 13. Full scale emission spectra of BNHMP in solid-state at various wavelengths.**

### 1. $^1\text{H}$ NMR Spectrum of BNHMP in $\text{CDCl}_3$ .

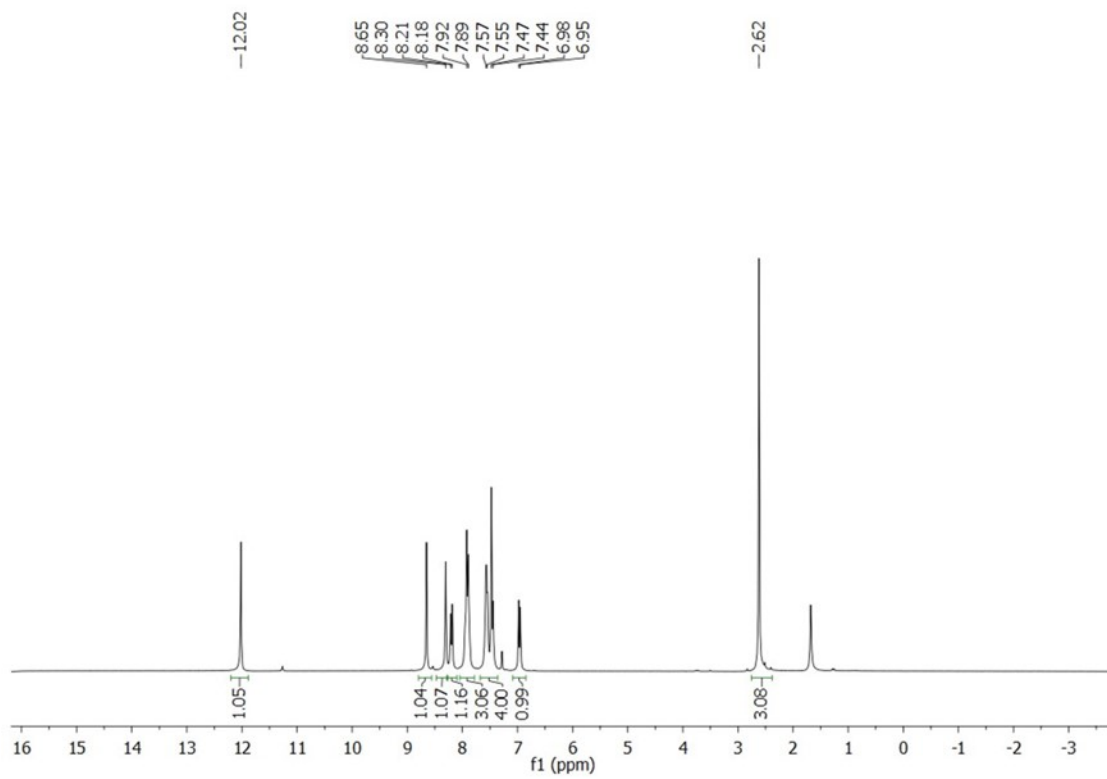

**Figure S1.**  $^1\text{H}$  NMR Spectrum of BNHMP in  $\text{CDCl}_3$ .

## 2. $^{13}\text{C}$ NMR Spectrum of BNHMP in $\text{CDCl}_3$ .

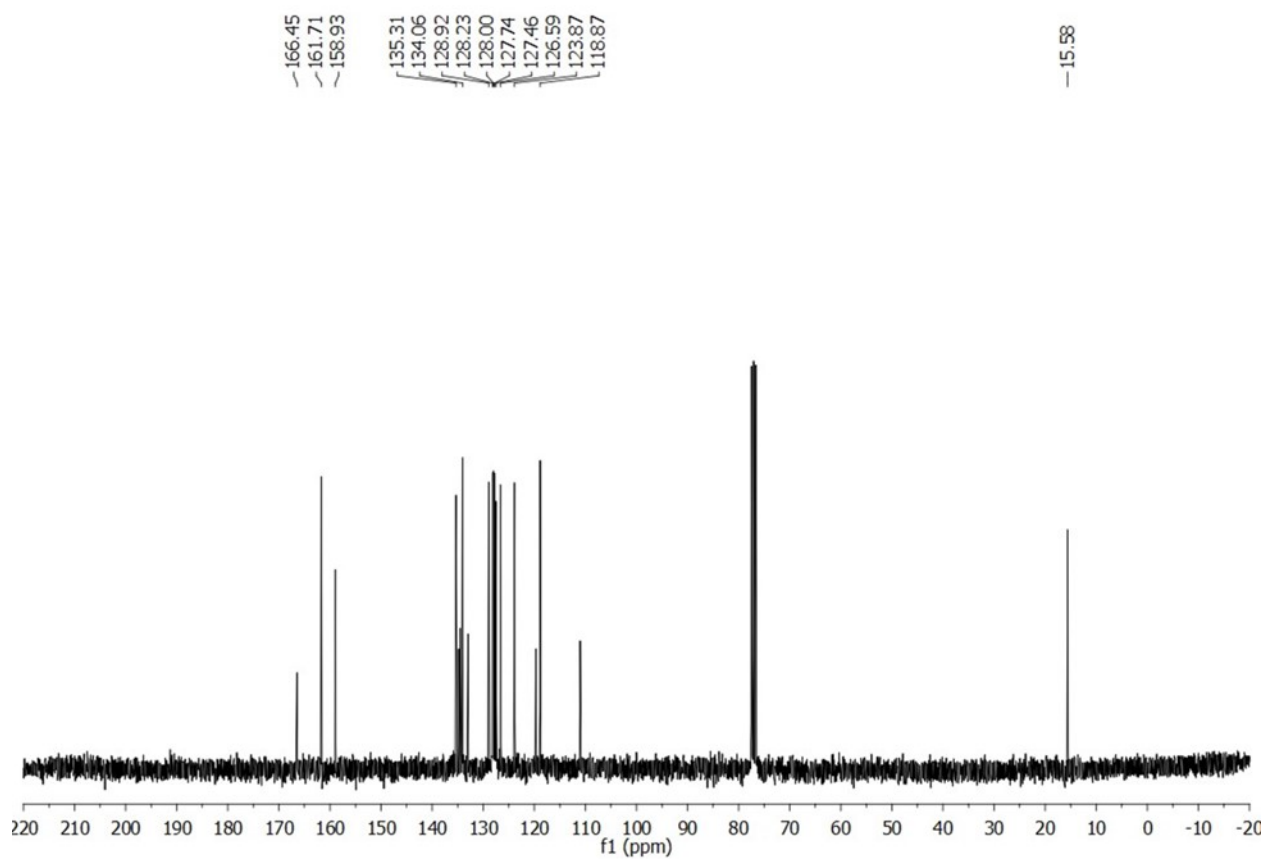

**Figure S2.**  $^{13}\text{C}$  NMR Spectrum of BNHMP in  $\text{CDCl}_3$ .

### 3. ESI-MS of BNHMP in acetonitrile.

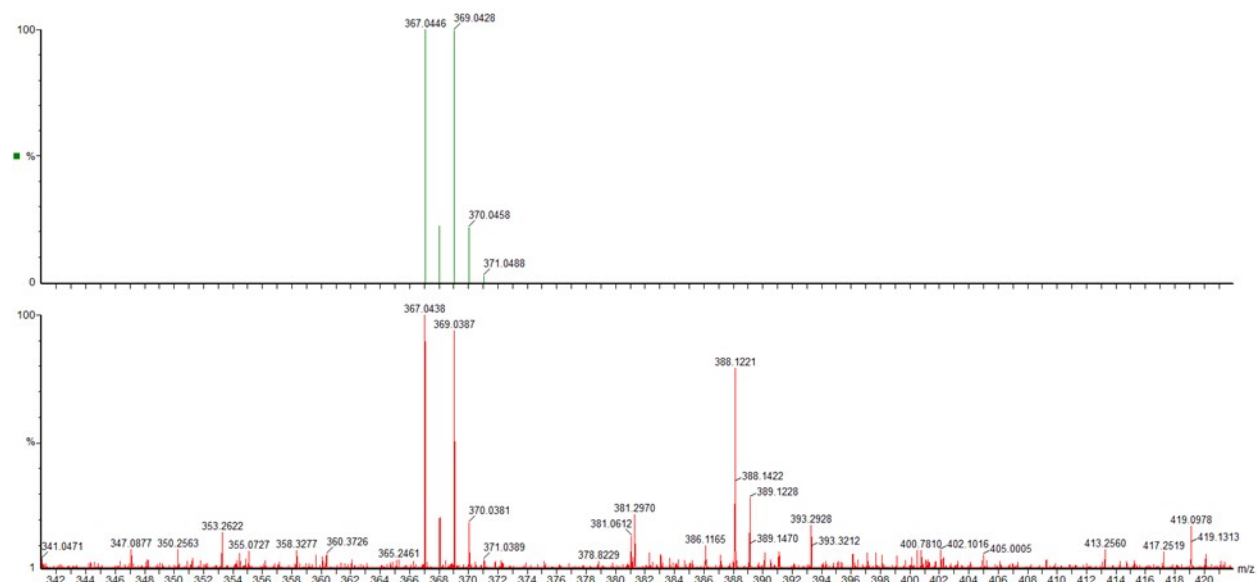

**Figure S3.** (Top) Experimentally obtained mass spectrum. (bottom) Simulated mass spectrum from isotopic modelling.

#### 4. FTIR Spectrum of BNHMP.

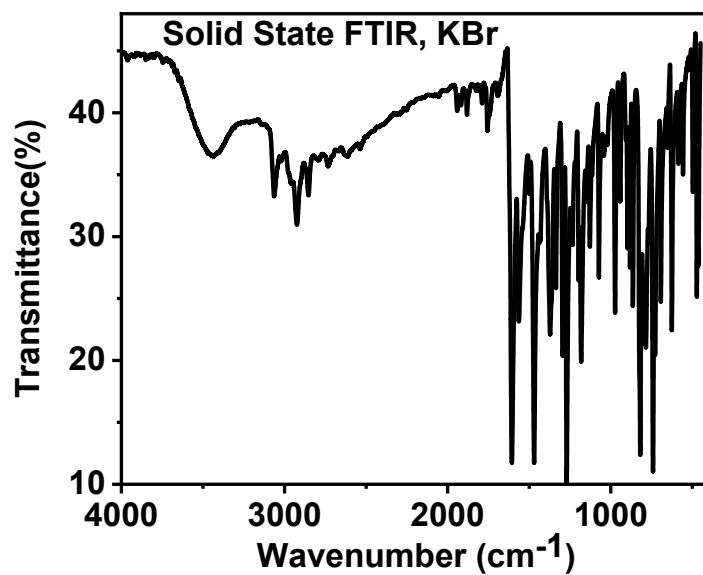

Figure S4. Solid state FTIR in BNHMP.

#### 5. ORTEP diagram of BNHMP

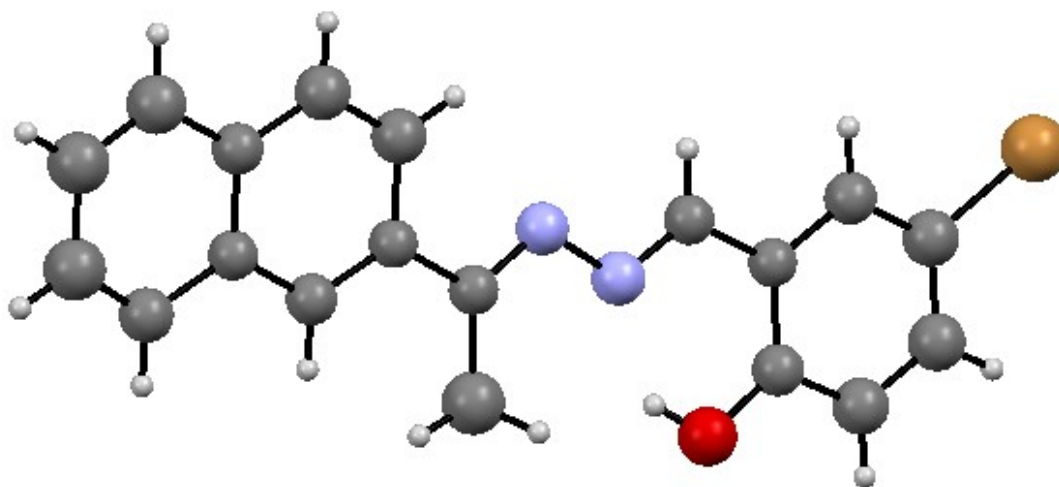

Figure S5. ORTEP diagram of BNHMP.

**6. Table for important crystallographic parameters of BNHMP.**

| <b>Parameters</b>                      | <b>BNHMP</b>                                        |
|----------------------------------------|-----------------------------------------------------|
| <b>Formula</b>                         | C <sub>19</sub> H <sub>15</sub> Br N <sub>2</sub> O |
| <b>Formula Weight</b>                  | 367.23                                              |
| <b>Crystal System</b>                  | monoclinic                                          |
| <b>Space group</b>                     | P 2 <sub>1</sub> /n                                 |
| <b>a [Å]</b>                           | 6.2672(6)                                           |
| <b>b [Å]</b>                           | 14.7584(12)                                         |
| <b>c [Å]</b>                           | 17.2093(13)                                         |
| <b><math>\alpha</math> [°]</b>         | 90                                                  |
| <b><math>\beta</math> [°]</b>          | 94.681(4)                                           |
| <b><math>\gamma</math> [°]</b>         | 90                                                  |
| <b>V [Å<sup>3</sup>]</b>               | 1586.4(2)                                           |
| <b>h, k, l (max.)</b>                  | 6,14,16                                             |
| <b>Z</b>                               | 4                                                   |
| <b>D(calc) [g/cm<sup>-3</sup>]</b>     | 1.538                                               |
| <b>F(000)</b>                          | 744.0                                               |
| <b>Temperature (K)</b>                 | 296                                                 |
| <b><math>\theta</math> Min-Max [°]</b> | 3.55, 19.980                                        |
| <b>No. of unique data</b>              | 1255                                                |
| <b>R(int)</b>                          | 0.068                                               |

|                                       |                |
|---------------------------------------|----------------|
| Observed data [ $I > 2.0 \sigma(I)$ ] | 675            |
| R1, wR2                               | 0.0268, 0.0712 |
| GOF on $F^2$                          | 1.068          |

---

### 7. Non-planarity of OH proton

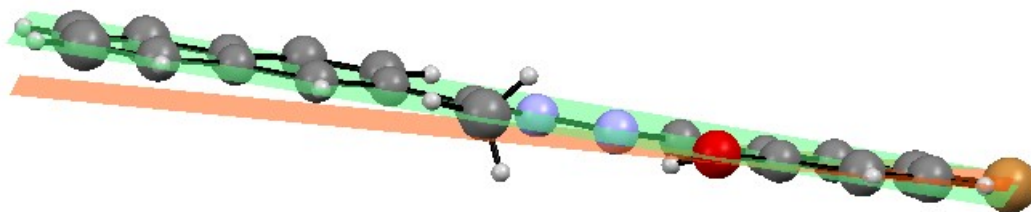

**Figure S6.** Non-planarity of the -OH group (contained in red plane) and the rest of **BNHMP** (contained in green plane).

8. Full scale emission spectra of BNHMP in various solvents and the corresponding CIE diagrams.

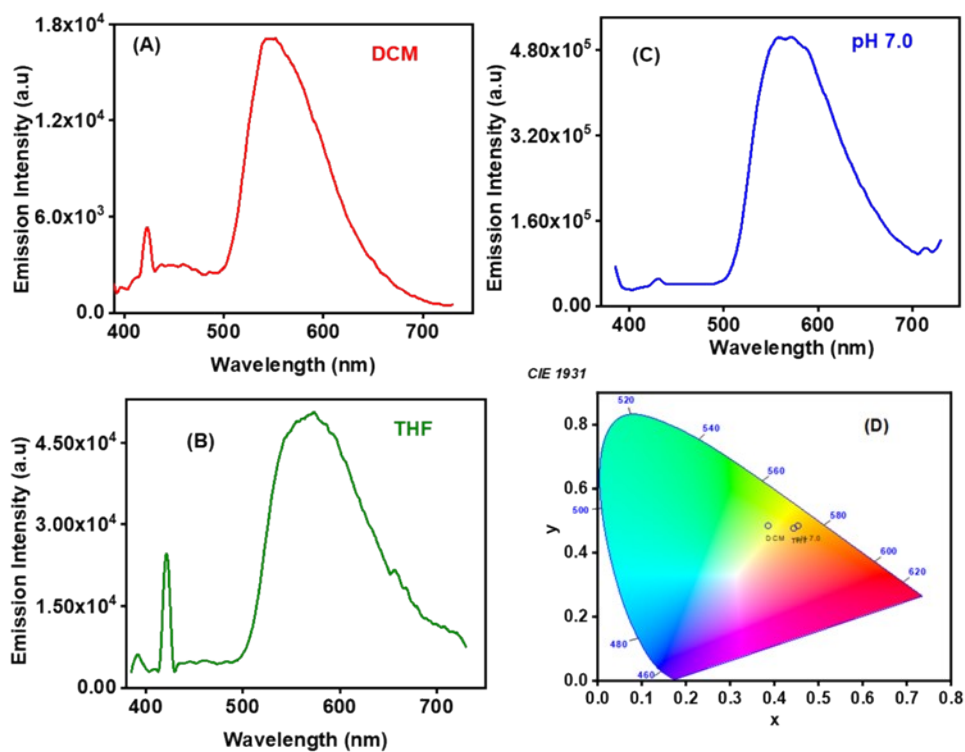

**Figure S7:** Full scale emission spectrum of **BNHMP** in (A) DCM, (B) THF, (C) water at pH 7.0 and (D) CIE diagram of **BNHMP** in DCM, THF and water.



**9. Time-resolved emission decays of BNHMP in various solvents at all observation wavelengths.**

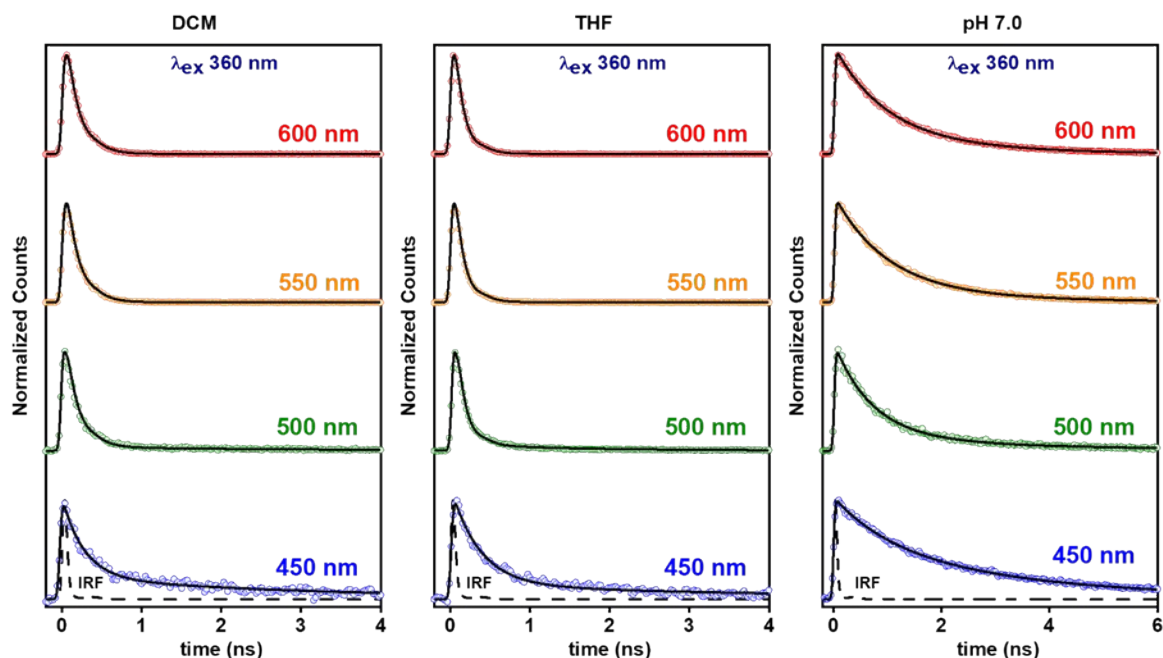

**Figure S8.** Lifetime emission decays of **BNHMP** in various solvents (10  $\mu$ M). The excitation and monitoring wavelengths are provided in the insets. The black lines denote the best multiexponential fit of the emission decays.

**10. Excited State lifetime parameters of BNHMP in DCM, THF and water.**

**Table S2.** Excited state lifetime parameters of **BNHMP** in DCM upon normalization to 100.  $\alpha_i$ s denotes the amplitudes. The error in estimation of the lifetimes is around 10%.

| $\lambda_{\text{mon}}$ | $\tau_1$ (ns) | $\alpha_1$ | $\tau_2$ (ns) | $\alpha_2$ |
|------------------------|---------------|------------|---------------|------------|
| 450 nm                 |               | 84         |               | 16         |
| 500 nm                 | 0.15          | 97         | 3.0           | 03         |
| 550 nm                 |               | 100        |               | -          |
| 600 nm                 |               | 100        |               | -          |

**Table S3.** Excited state lifetime parameters of **BNHMP** in THF upon normalization to 100.  $\alpha_i$ s denotes the amplitudes. The error in estimation of the lifetimes is around 10%.

| $\lambda_{\text{mon}}$ | $\tau_1$ (ns) | $\alpha_1$ | $\tau_2$ (ns) | $\alpha_2$ |
|------------------------|---------------|------------|---------------|------------|
| 450 nm                 |               | 82         |               | 18         |
| 500 nm                 | 0.10          | 96         | 1.5           | 04         |
| 550 nm                 |               | 99         |               | 01         |
| 600 nm                 |               | 100        |               | -          |

**Table S4.** Excited state lifetime parameters of **BNHMP** in water upon normalization to 100.  $\alpha_i$ s denotes the amplitudes. The error in estimation of the lifetimes is around 10%.

| $\lambda_{\text{mon}}$ | $\tau_1$ (ns) | $\alpha_1$ | $\tau_2$ (ns) | $\alpha_2$ |
|------------------------|---------------|------------|---------------|------------|
| 450 nm                 |               | 45         |               | 55         |
| 500 nm                 | 0.90          | 79         | 3.2           | 21         |
| 550 nm                 |               | 86         |               | 14         |
| 600 nm                 |               | 55         |               | 45         |

### 11. Steady state emission spectra of BNHMP in ethanol, PEG-400 and water.

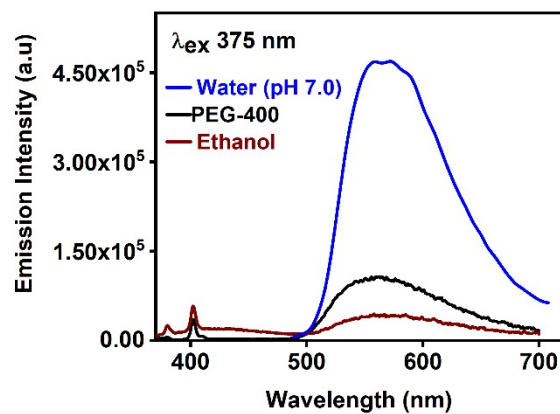

**Figure S9.** Steady state emission spectra of **BNHMP** (10  $\mu$ M) in ethanol, PEG-400 and water. The excitation wavelength was 375 nm.

### 12. Full range solid state emission spectrum upon excitation at 300 nm.

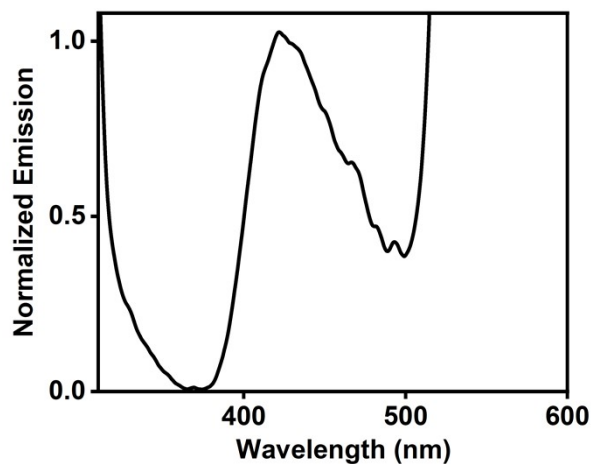

**Figure S10:** Full range solid state emission spectrum upon excitation at 300 nm.

13. Full scale emission spectra of BNHMP in solid-state at various wavelengths.

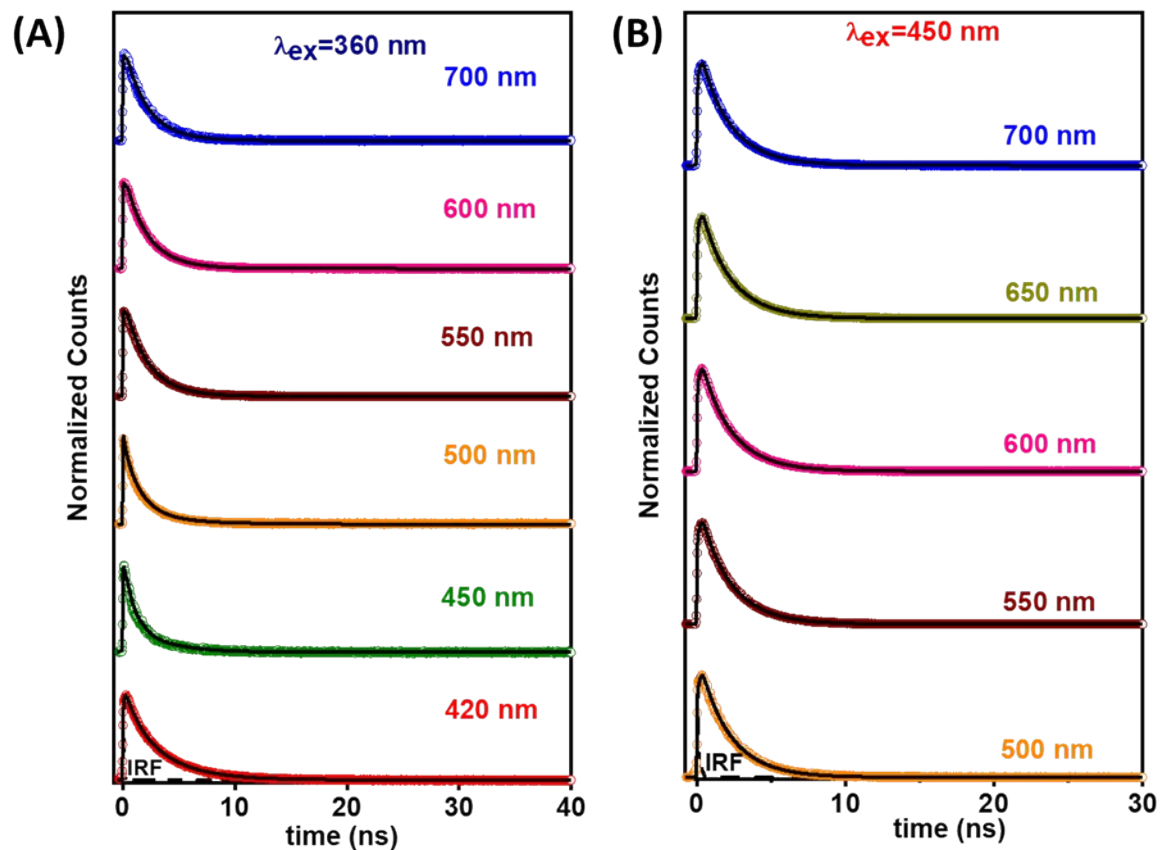

**Figure S11.** Full scale emission spectra of **BNHMP** in solid-state at various wavelengths upon excitation at (A) 360 nm and (B) 450 nm. The black lines denote the best multiexponential fit of the emission decays.
